# Supplementary material for: Solution-phase Graphene Synthesis
Source: Research Square preprint supplement (doi:10.21203/rs.3.rs-8151593/v1), 2025-12-02
Supplement: Supplementary file 1 [file b73434fab0ad3d6fa8bbedf9.docx]

Supplementary Information **Solution-phase Graphene Synthesis**

**Authors:** Jingjing Liu1, 5 †, Yumeng Zhang3, 6 †, Tianle Guo4, 5 *, Guanyang He3, Yilu Qin1, Zhourui Hu2, Gang Zhou7, Zhongkai Liu3 *, Junhao Chu1, 5, Jianlu Wang1, 2, 5 *

**Affiliations:**

1Institute of Optoelectronics, College of Future Information Technology, Shanghai Frontiers Science Research Base of Intelligent Optoelectronics and Perception, Fudan University, Shanghai 200433, China.

2Frontier Institute of Chip and System, College of Integrated Circuits and Micro-Nano Electronics, State Key Laboratory of Integrated Chips and Systems, Fudan University, Shanghai 200433, China.

3State Key Laboratory of Quantum Functional Materials, School of Physical Science and Technology, ShanghaiTech Laboratory for Topological Physics, ShanghaiTech University; Shanghai, 201210, China

4Shaoxin Laboratory, Shaoxing, 312035, China

5State Key Laboratory of Infrared Physics, Shanghai Institute of Technical Physics, Chinese Academy of Sciences; Shanghai, 200083, China.

6Zhangjiang Laboratory, 100 Haike Road, Pudong, Shanghai 201210, China

7Laboratory of Advanced Materials, State Key Laboratory of Molecular Engineering of Polymers, Fudan University, Shanghai 200433, China.

†These authors contributed equally to this work

*Corresponding author. Email: tianle.guo@sxlab.ac.cn (T. G.), liuzhk@shanghaitech.edu.cn (Z. L.), jianluwang@fudan.edu.cn (J. W.).

**Table of Contents**

[Section 1. Materials and Methods 3](#_Toc20219)

[1.1 Materials 3](#_Toc12506)

[1.2 Methods 3](#_Toc491)

[Section 2. Identification of Key Intermediates 6](#_Toc6556)

[Section 3. The Morphology and Crystal Characterizations of Graphene Flakes 22](#_Toc9486)

[Section 4. Nano-ARPES 28](#_Toc29077)

## Section 1. Materials and Methods

### 1.1 Materials

Mercury triflate (Hg(OTf)2, 98%) was purchased from Aladdin. **ATTENTION**: **Mercury compounds are extremely toxic compounds and should be handled with extreme care!** Triflic acid (CF3SO3H, 98%) was purchased from TCI. Dichloromethane (CH2Cl2, GC reagent, ≥ 99.9%), Chloroform (CHCl3, GC reagent, ≥ 99.9%), Tetrachloromethane (CCl4, GC reagent, ≥ 99.9%), Dimethylsulfoxide-D6 (DMSO-d6, ≥ 99.9 atom% D, contains 0.05 % (v/v) TMS) were purchased from Aladdin. Ammonia solution (NH4OH, 28-30%), Silver nitrate solution (AgNO3, ACS reagent, ≥ 99.0%), 2,6-Di-tert-butyl-4-methylphenol (BHT, GC reagent, ≥ 99.9%) were purchased from Sigma-Aldrich. Deionized water (18.2 MΩ·cm) was used for quenching. Anodic aluminum oxide (AAO) membranes (pore size 0.02 μm, Anodisc 47) and Polypropylene (PP) filter (0.22 μm) were purchased from Whatman.

### 1.2 Methods

All reactions were conducted under ambient condition in a fume hood. Reagents were used as received from commercial sources unless otherwise noted. To avoid contamination, care was taken not to introduce any extraneous carbon sources during the reaction or post-processing; only CH2Cl2 was used as the solvent for post-processing, which evaporates readily with minimal residual influence. Safety note: Triflic acid (TfOH) and mercury(II) triflate (Hg(OTf)2) are highly corrosive and toxic; handle with appropriate personal protective equipment (PPE), and dispose of waste according to local regulations. Yields and observations were reproducible across at least three independent runs.

**One-pot Synthesis for graphene flakes**

Take CH2Cl2 solvent as the C1 carbon source for example (10 ml, 1 equiv.). A pre-dried 250 ml three-necked round-bottom flask equipped with an Allihn condenser (circulating water at 4°C) was charged with Hg(OTf)₂ (50 mg, equivalent to 0.064 mol% relative to CH2Cl2) and TfOH (1 ml, equivalent to 7.24 mol% relative to CH2Cl2). The mixture was heated to 100°C in a stabilized oil bath with magnetic stirring (300 rpm). After 5 min, CH2Cl2 (10 ml; alternatively, 10 ml CHCl3 or 10 ml CCl4) was added, and the reaction continued for 2 hours under reflux. Color changes were also observed: in CHCl3, solution turned brown within 5 min and deepened over time, yielding the most graphene products; CCl4 showed intermediate changes; in CH2Cl2, solution turned brown after ~30 min. Upon completion, the flask was removed from the oil bath and quenched with deionized water. The quenched solution was further neutralized with ammonia to pH 7. The mixture was then filtered through a polypropylene (PP) membrane (0.22 μm pore size), yielding shiny crystalline flakes on the membrane. These were transferred using dicing tape for imaging, then mechanically exfoliated via the Scotch tape method (repeated folding/unfolding 5–10 times, using dicing tape as well) and deposited onto silicon wafers for characterization. For graphene seeds: The quenched and neutralized mixture was filtered through an anodic aluminum oxide (AAO) membrane (0.02 μm pore size). The membrane was washed with deionized water and flushed with ethanol into a 2 ml vial. The suspension was drop-cast onto carbon-coated TEM grids and dried for analysis.

**The identification of Cl- Ions:** After quenching, the resulting product was then extracted with CH2Cl2 and water to separate organic and aqueous phases. For the aqueous phase, upon addition of 0.1 mol/L AgNO3 solution, formed a white precipitate that redissolved in excess ammonia, confirming free Cl- ions (from the dehalogenation of chloromethane).

**Product of water-phase:** Following quenching, neutralization with ammonia to pH 7, and extraction with CH2Cl2 and water, the aqueous phase was isolated and subjected to rotary evaporation to completely remove water. This process yielded a large amount of white solid product (**Fig. S1a**). The solid was redissolved in DMSO-d6 and analyzed by NMR spectroscopy. As shown in **Fig. S1b-d**, the 1H NMR spectrum displayed signals corresponding to NH4+, while the 13C NMR spectrum showed only the carbon signal from OTf, indicating the absence of other high evaporating temperature (> water) organic substances in the aqueous phase products.

**The Identification of HgCl2**: After water quenching and neutralization with ammonia to pH 7 (no extraction), the mixture was rotary evaporated (60 °C). As shown in **Fig S2**, needle-like crystals were found on the condenser connector during evaporation and were collected manually and further validated through XRD.

**The Identification of TfOTf**: Due to the extreme sensitivity of triflic anhydride (TfOTf) to water, the crude reaction solution was subjected to rotary evaporation without prior quenching, neutralization, or extraction. The resulting residue was dissolved in DMSO-d6 for NMR analysis, which displayed 19F NMR peaks identical to those of standard TfOTf and TfOH, confirming the presence of triflic anhydride (**Fig. S3**).

**The Identification of oil-phase products:** During purification of the oil phase products, we observed that neutralization with ammonia to remove excess acid led to rapid hydrolysis of small-molecule products bearing OTf substituents, generating low-boiling-point alcohols that migrated into the aqueous phase during extraction and complicated subsequent purification steps. However, some hydrolysis of these products was inevitable; over time, a new acidic layer gradually appeared in the oil phase products, indicating the conversion of OTf groups to TfOH. To streamline the isolation of key products, we skipped ammonia neutralization after reaction termination and instead performed rapid oil-water separation to quickly remove the majority of excess acid. The oil phase was then subjected to rotary evaporation to remove the remaining solvent, and the residue was drop-cast onto a thin-layer chromatography (TLC) plate (silica gel, 1 mm thick, 20 × 20 cm, non-fluorescent). Multi-step development in CH2Cl2:methanol mixtures allowed separation, enabling extraction of CH3OTf, CH3CH2OTf, *t*-C4H9OH, and BHT from distinct bands.

**Angle-resolved photoemission spectroscopy**: Angle-resolved photoemission spectroscopy (ARPES) measurements were performed at the BL07U endstation of the Shanghai Synchrotron Radiation Facility (SSRF). To ensure optimal surface cleanliness for nano-ARPES measurements, we implemented a rigorous sample preparation protocol. Bulk crystal samples were attached to Kapton tape and transferred to a glovebox, where they were adhered to a silicon surface freshly coated with ~5 nm of gold. The prepared sample was then transferred to a high-vacuum exfoliation chamber (<10-9 mbar) for Kapton tape removal. The resulting exfoliated flakes were marked and transferred to the main chamber (<1 × 10-10 mbar) for characterization. Post-ARPES AFM measurements confirmed a sample thickness of approximately 30 nm (**Fig. S23**). For the ARPES measurements, we used a beam focused by a Fresnel zone plate (FZP), achieving a spatial resolution of ~400 nm. Experiments were conducted at 20 K with a photon energy of 92 eV, using linear-horizontal polarized light at a fixed 60° incidence angle. Data were collected using a hemispherical Scienta DA30 electron analyzer, with instrumental energy and momentum resolutions of ~35 meV and 0.01 Å-1, respectively.

**Characterization Details**

All NMR measurements were carried out on a Bruker AVANCE III 400 MHz spectrometer to analyze the chemical environment of the products. Mass spectrometry (MS) analyses, including matrix-assisted laser desorption/ionization time-of-flight (MALDI-TOF) MS, were conducted using an AB SCIEX TOF/TOF 5800 system to determine molecular masses and compositions. Powder X-ray diffraction (PXRD) patterns were performed on Bruker Advanced D8 instrument using Cu-Kα radiation (λ=1.54178 Å) in the 2θ range of about 3-60º with a scanning rate of 4º min-1 and a step of 0.02º. Raman spectra were obtained by a Jobin-Yvon HR-Evolution micro-Raman system (France) equipped with a charge-coupled detector (excitation wavelength of 532 nm or 638 nm or 785 nm), and the spot size of the laser beam was approximately 0.5 μm. TEM measurements were carried out on a JEOL JEM-2100F microscope operated at an accelerating voltage of 200 kV. Aberration-corrected TEM (AC-TEM) images were obtained on a ThermoFisher Spectra 300 double aberration-corrected transmission electron microscope for high-resolution imaging. Scanning tunneling microscopy (STM) measurements were performed under ultrahigh vacuum (pressure ≤ 1 × 10-11 mbar) at 4.3 K using a Unisoku JT-STM system equipped with a PtIr scanning tip. AFM measurements using a Cypher S system (Asylum Research) to characterize surface morphology and topography at the nanoscale.

## Section 2. Identification of Key Intermediates

The mechanistic pathway of the super magic acid-catalyzed carbon assembly process was elucidated through identification of key intermediates formed during the transformation of chloromethane to extended carbon frameworks. Critical intermediates were isolated and characterized: CH3OTf, CH3CH2OTf, *t*-C4H9OH (hydrolysis product of *t*-C4H9OTf), and BHT.

**CH3OTf**: 1H-NMR (400 MHz, DMSO-d6) δ (ppm): 4.54 (s). 13C-NMR (101 MHz, DMSO-d6) δ (ppm): 125.38, 122.19, 119.01, 115.82, 56.72. 19F-NMR (376 MHz, DMSO-d6) δ (ppm): -77.90. MS (m/z) [M]+ calculated for [C2H3SO3F3]+: 164.10, found: 164.10. **Fig. S4-S6.**

**CH3CH2OTf:** 1H-NMR (400 MHz, DMSO-d6) δ (ppm): 1.18 (t, 3H), 3.10 (m, 2H). 13C-NMR (101 MHz, DMSO-d6) δ (ppm): 125.92, 122.72, 119.52, 116.38, 46.25, 9.03. 19F-NMR (376 MHz, DMSO-d6) δ (ppm): -77.05. MS (m/z) [M]+ calculated for [C3H5O3SF3]+: 178.13, found: 178.12. **Fig. S7-S9.**

***t*-C4H9OH** (hydrolysis product of *t*-C4H9OTf)**:** 1H-NMR (400 MHz, DMSO-d6) δ (ppm): 1.12 (s, 9H), 4.21 (s, 1H). 13C-NMR (101 MHz, DMSO-d6) δ (ppm): 67.36, 31.64. **Fig. S10-S11.**

**BHT:** 1H-NMR (400 MHz, DMSO-d6) δ (ppm): 1.37 (s, 18H), 2.19 (s, 3H), 6.66 (s, 1H), 6.88 (s, 2H). 13C-NMR (101 MHz, DMSO-d6) δ (ppm): 151.99, 139.53, 128.41, 125.33, 34.83, 30.89, 21.51. MS (m/z) [M]+ calculated for [C15H24O]+: 220.36, found: 220.35. Yields: ~0.5% in CCl4, ~0.8% in CHCl3, ~0.4% CH2Cl2, calculated from the molar weight of carbon. **Fig. S12-S15.** The isolated yields of BHT were approximately 0.7% in CCl4, 1.1% in CHCl3, and 0.4% in CH2Cl2. These yields were calculated based on the carbon content of the starting solvent, assuming stoichiometric incorporation of 15 carbon atoms from the solvent into each molecule of BHT. For example, if 15 mol of carbon source theoretically produces 1 mol of BHT and the experiment yields 0.01 mol of BHT, the calculated yield is 1%.

**Water-phase product**


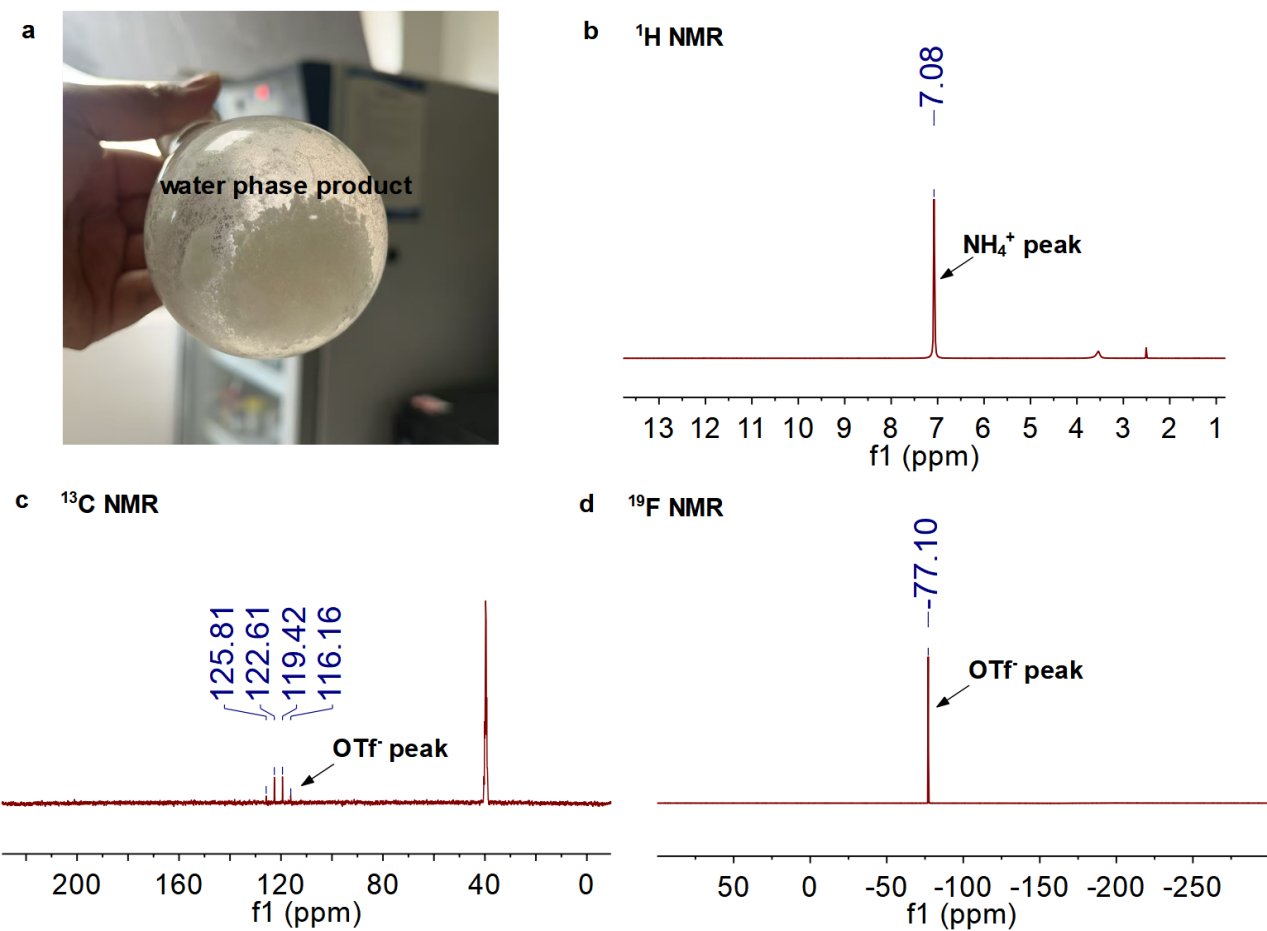


Fig. S1. a, Image of water phase product. b, 1H NMR spectra. c, 13C NMR spectra. d, 19F NMR spectra. The 1H NMR spectrum displayed signals corresponding to NH4+, while the 13C NMR spectrum showed only the carbon signal from OTf, indicating the absence of other high evaporating temperature (> water) organic substances in the aqueous phase products.

**Outcomes — HgCl2:**


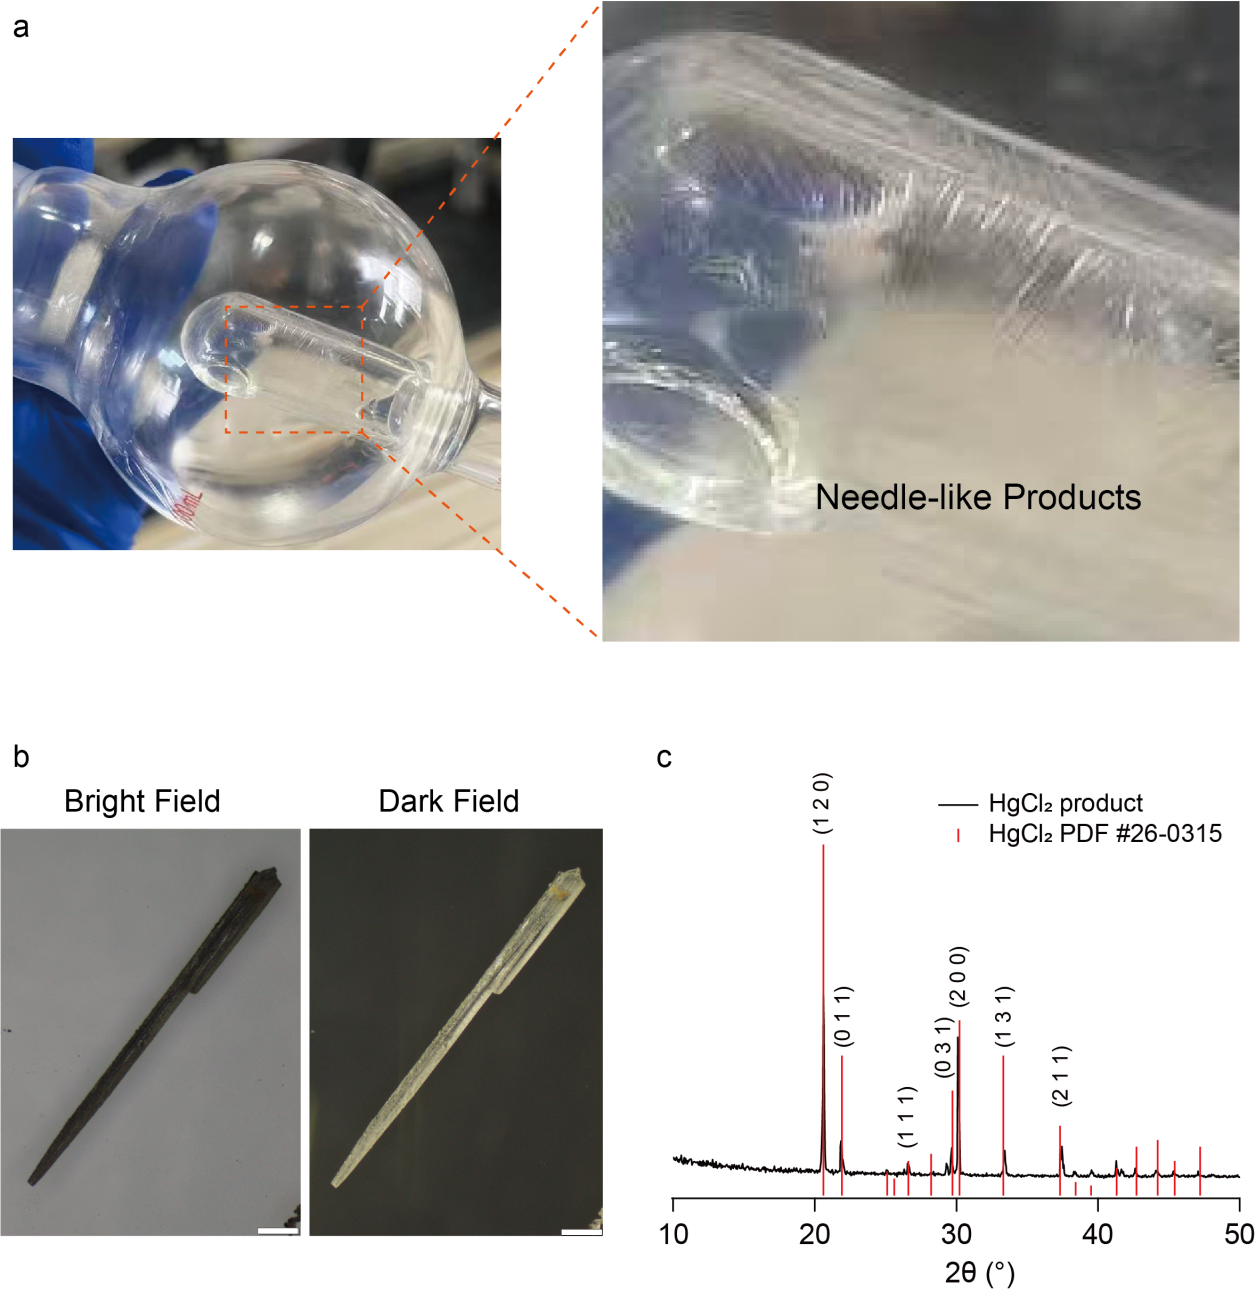


Fig. S2. Needle-like products of HgCl2. a, images of needle-like products at the wall of rotary evaporator vial. b, Bright and dark field images of those needle-like solids. c, XRD of the precipitate and corresponding PDF references.

**Outcomes — triflic anhydride TfOTf:**


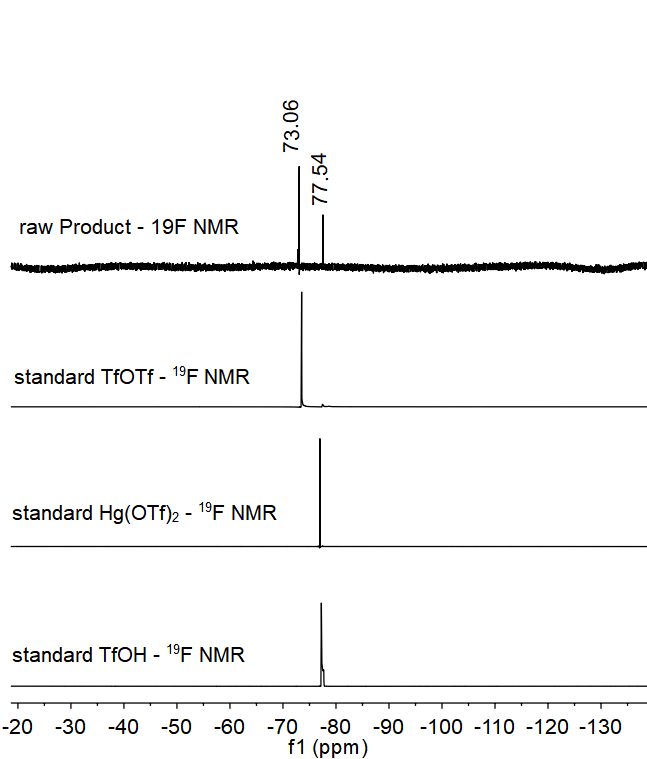


Fig. S3. 19F NMR of raw products and related standards, indicating the existence of TfOTf.

**Key intermediate — CH3OTf**

**
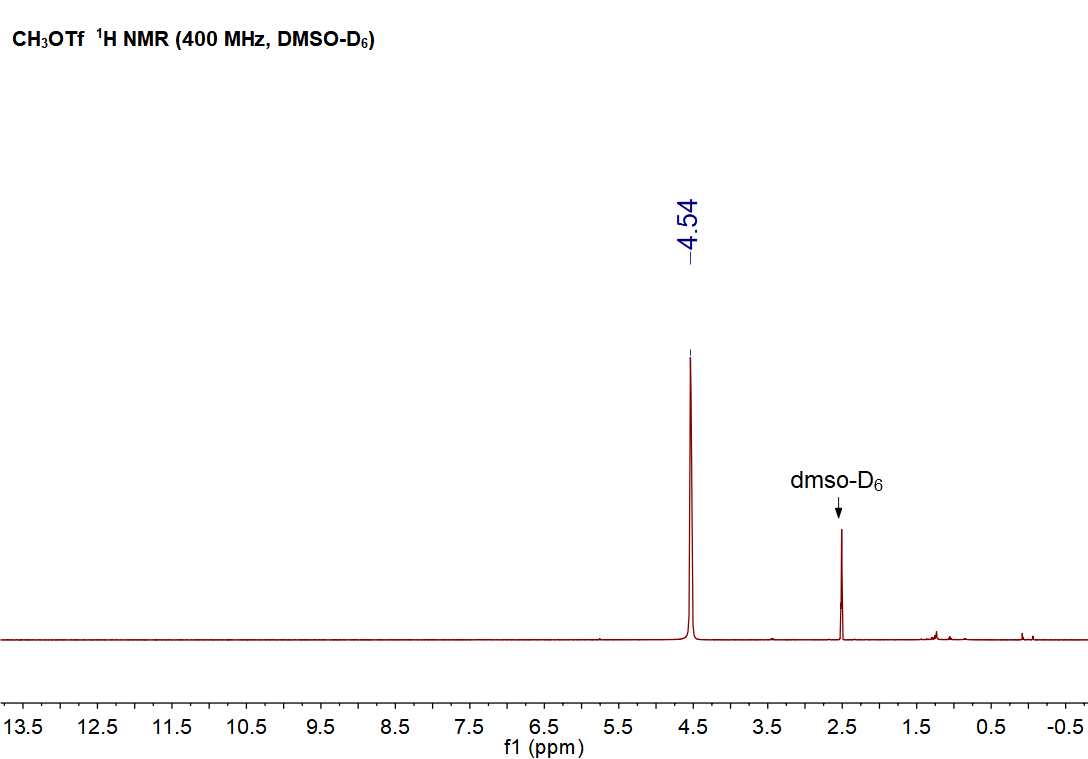
**

Fig. S4. 1H NMR spectra of CH3OTf.

**
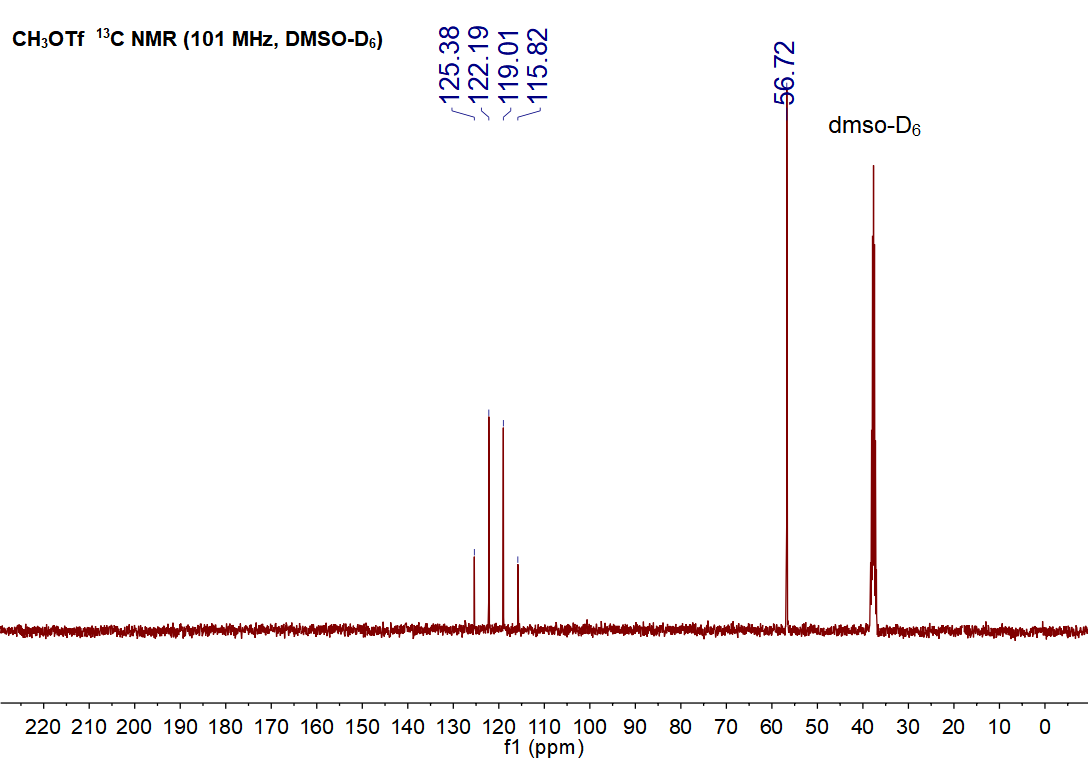
**

Fig. S5. 13C NMR spectra of CH3OTf.

**
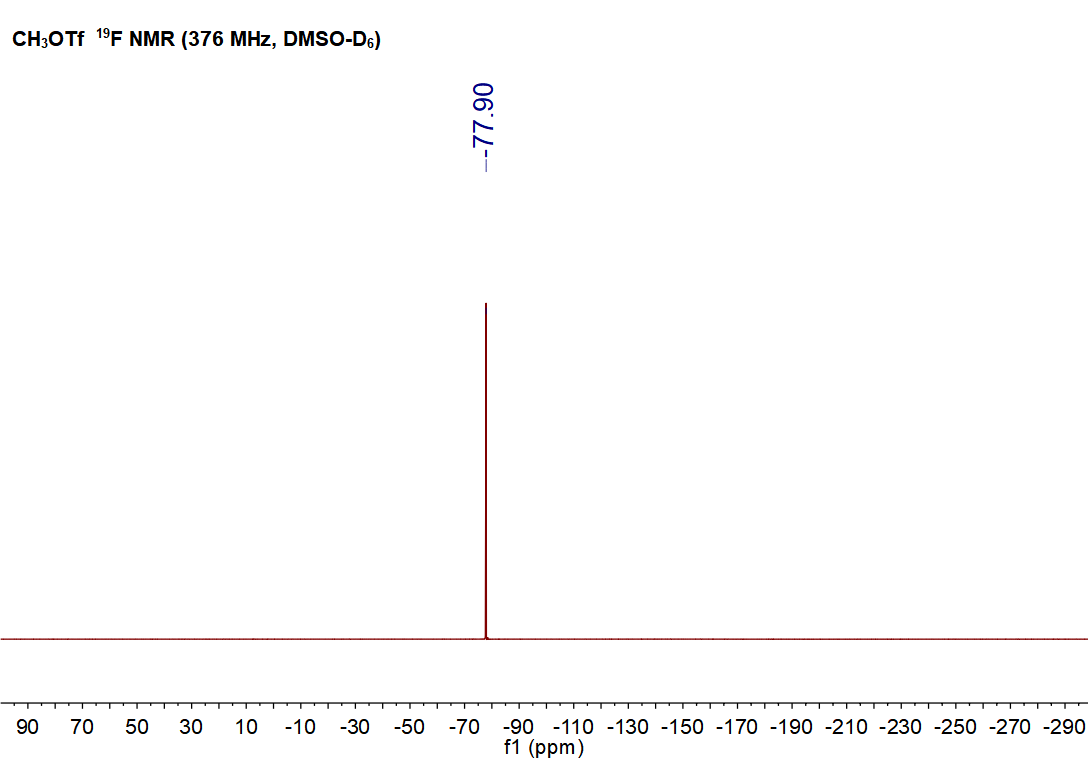
**

Fig. S6. 19F NMR spectra of CH3OTf.

**Key intermediate — CH3CH2OTf**


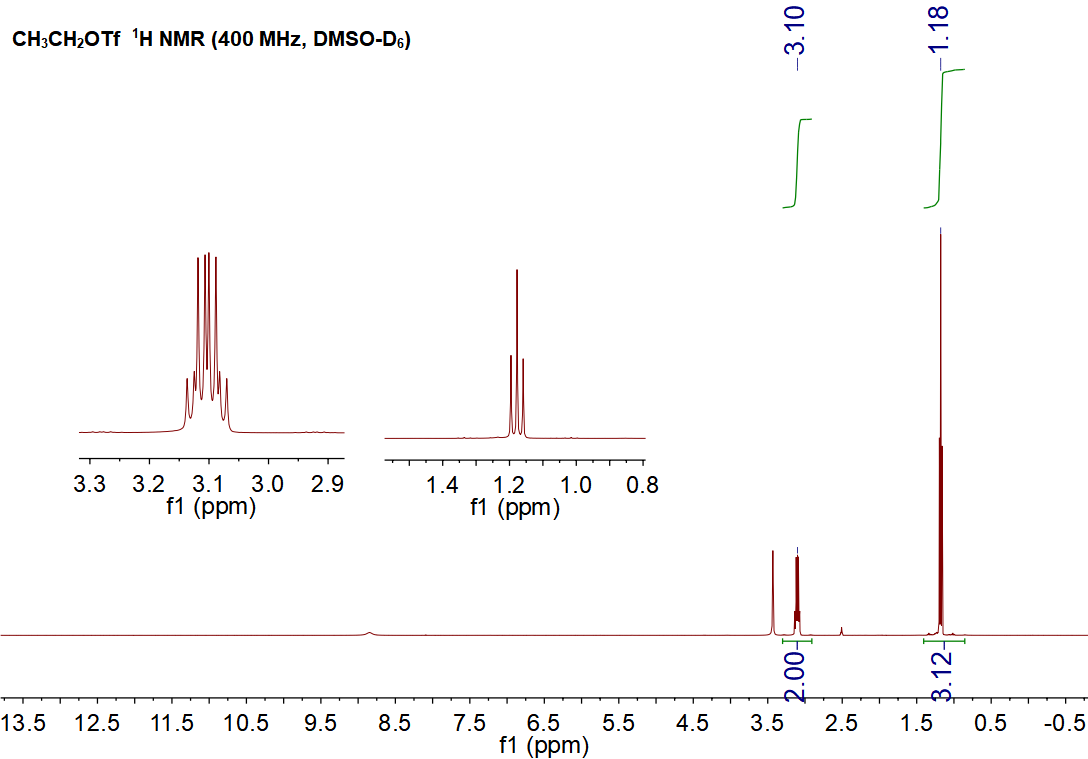


Fig. S7. 1H NMR spectra of CH3CH2OTf.


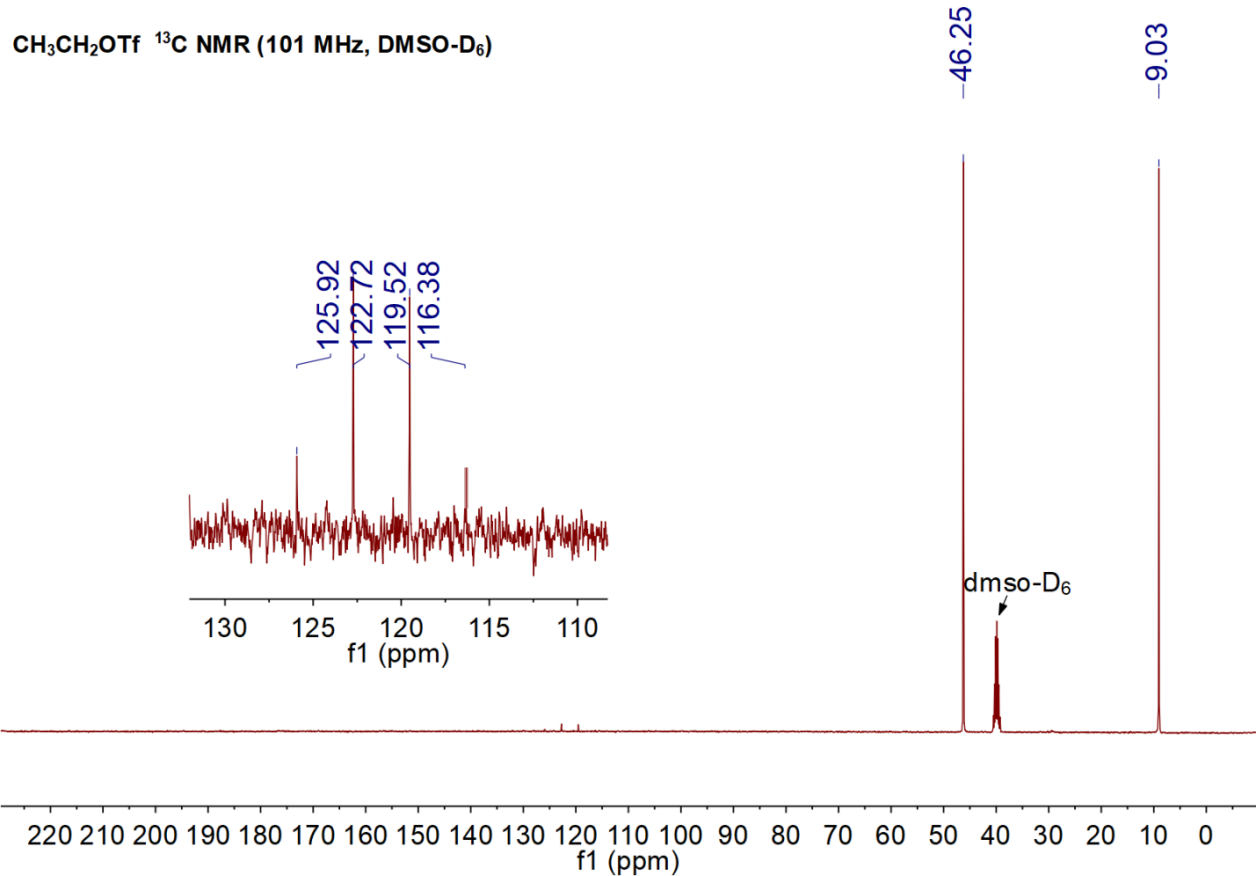


Fig. S8. 13C NMR spectra of CH3CH2OTf.


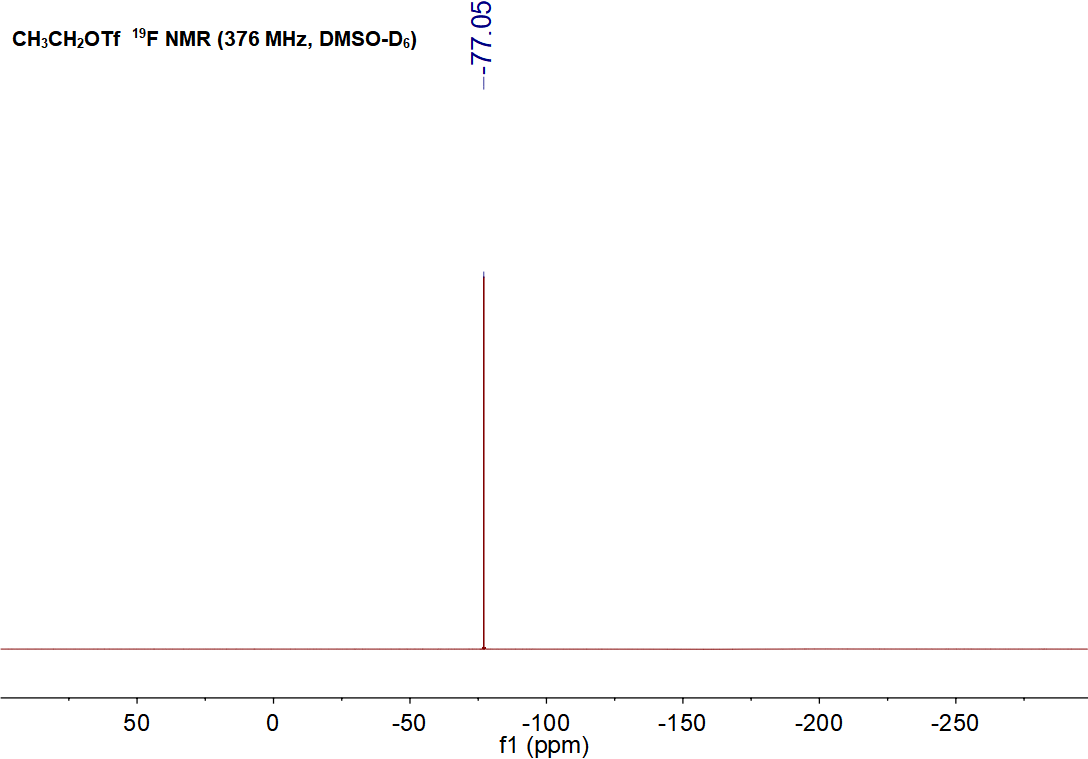


Fig. S9. 19F NMR spectra of CH3CH2OTf.

**Key intermediate — *t*-C4H9OH (hydrolysis product of *t*-C4H9OTf)**


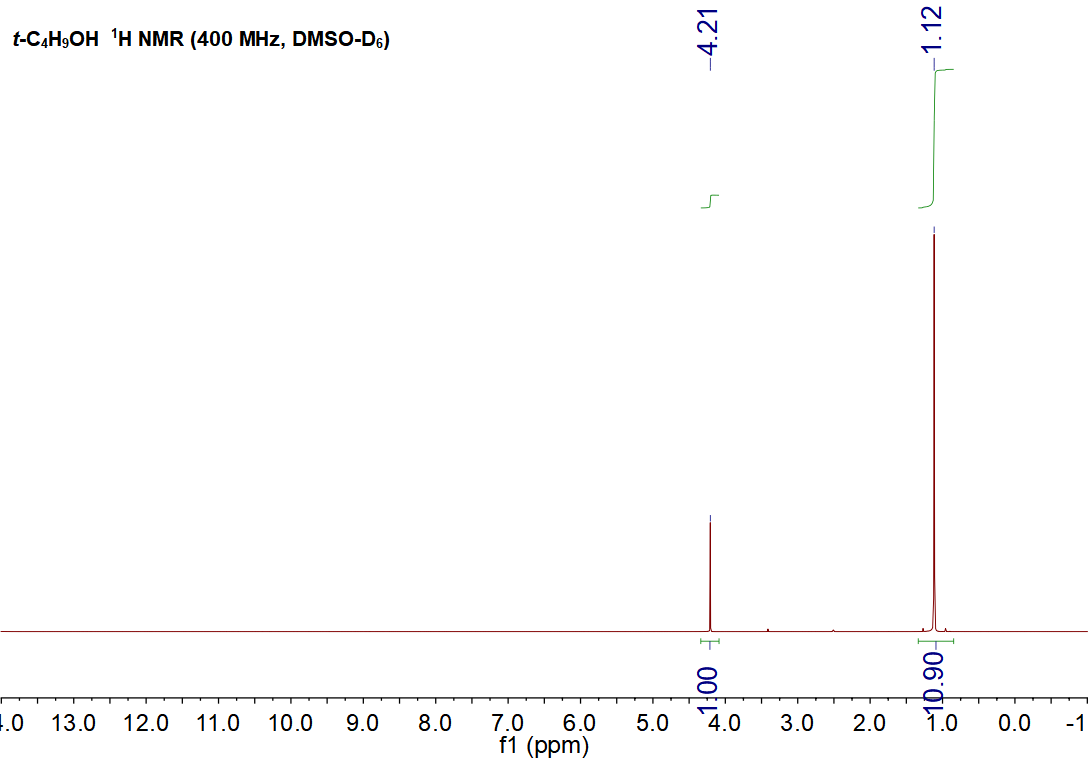


Fig. S10. 1H NMR spectra of t-C4H9OH.


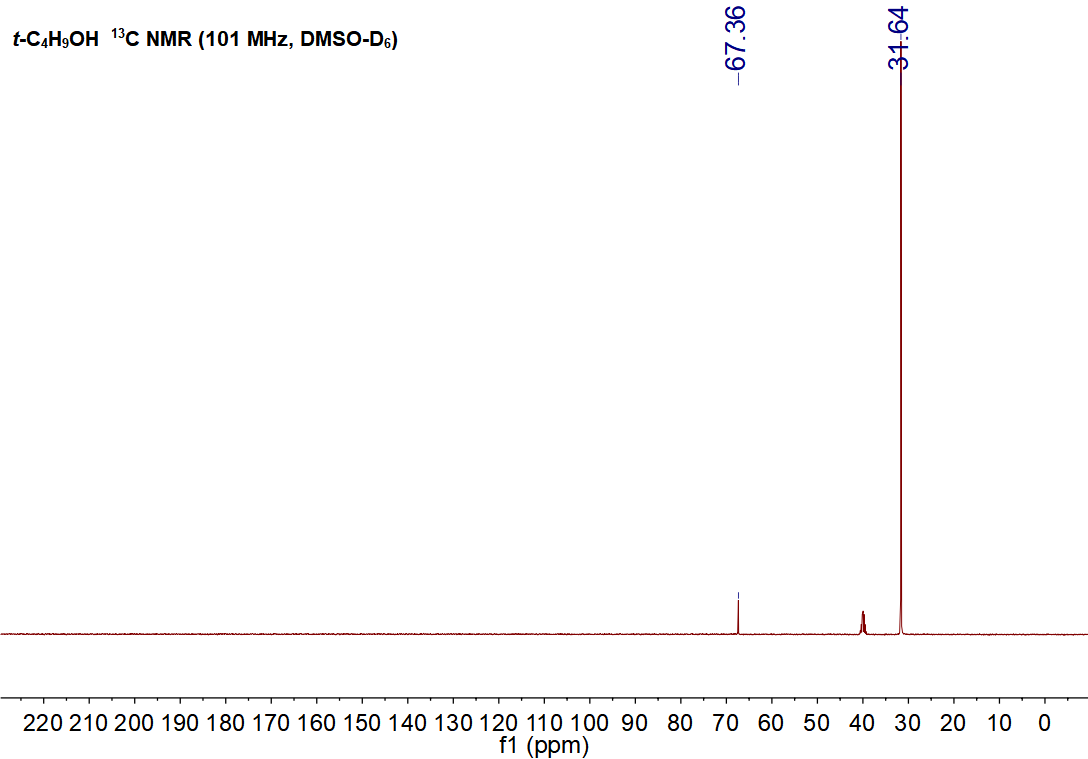


Fig. S11. 13C NMR spectra of t-C4H9OH.

**Identification of BHT**

**
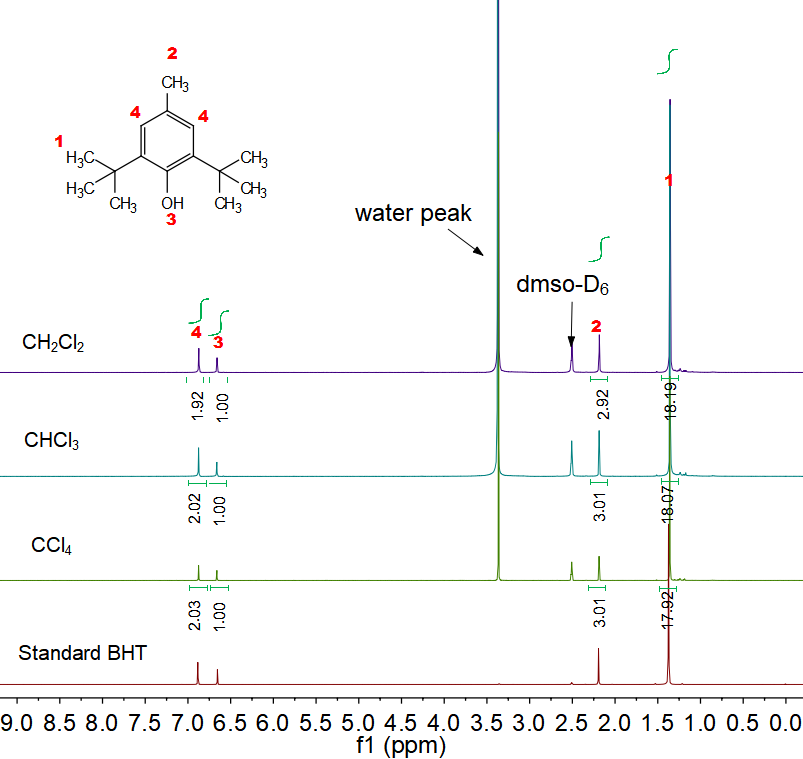
**

Fig. S12. Comparative 1H NMR spectra of BHT standard and BHT products obtained from different chlorinated carbon feedstocks (CH2Cl2, CHCl3, CCl4).

**
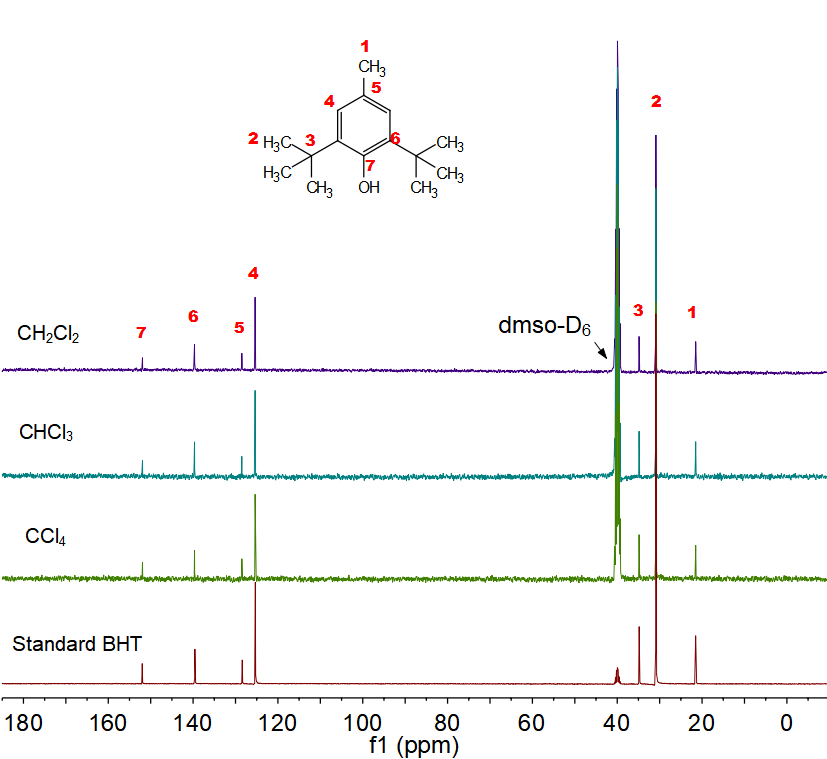
**

Fig. S13. Comparative 13C NMR spectra of BHT standard and BHT products obtained from different chlorinated carbon feedstocks (CH2Cl2, CHCl3, CCl4).

**
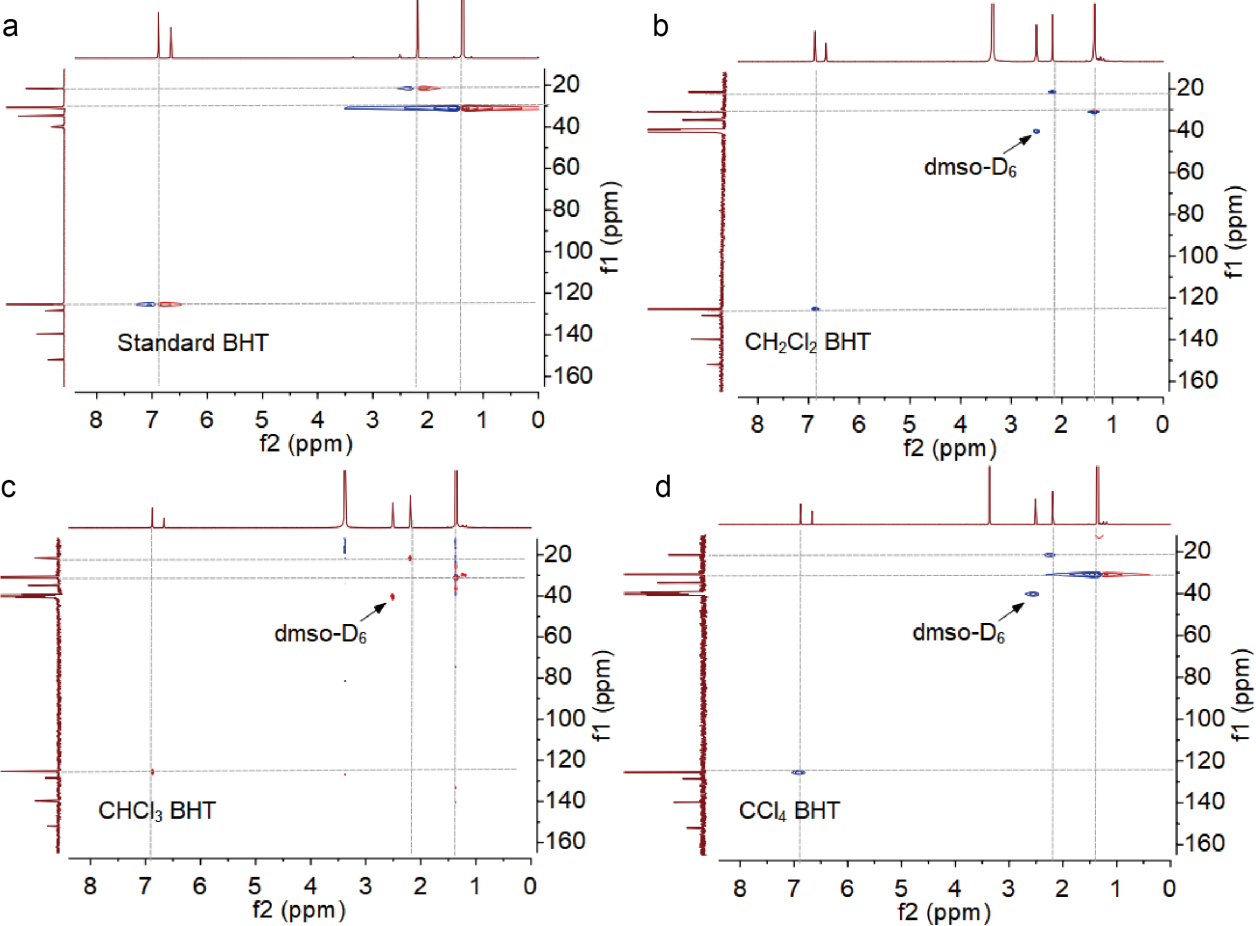
**

Fig. S14. Comparative HSQC NMR spectra of BHT standard (a) and BHT products obtained from different chlorinated carbon feedstocks (b, c, d).


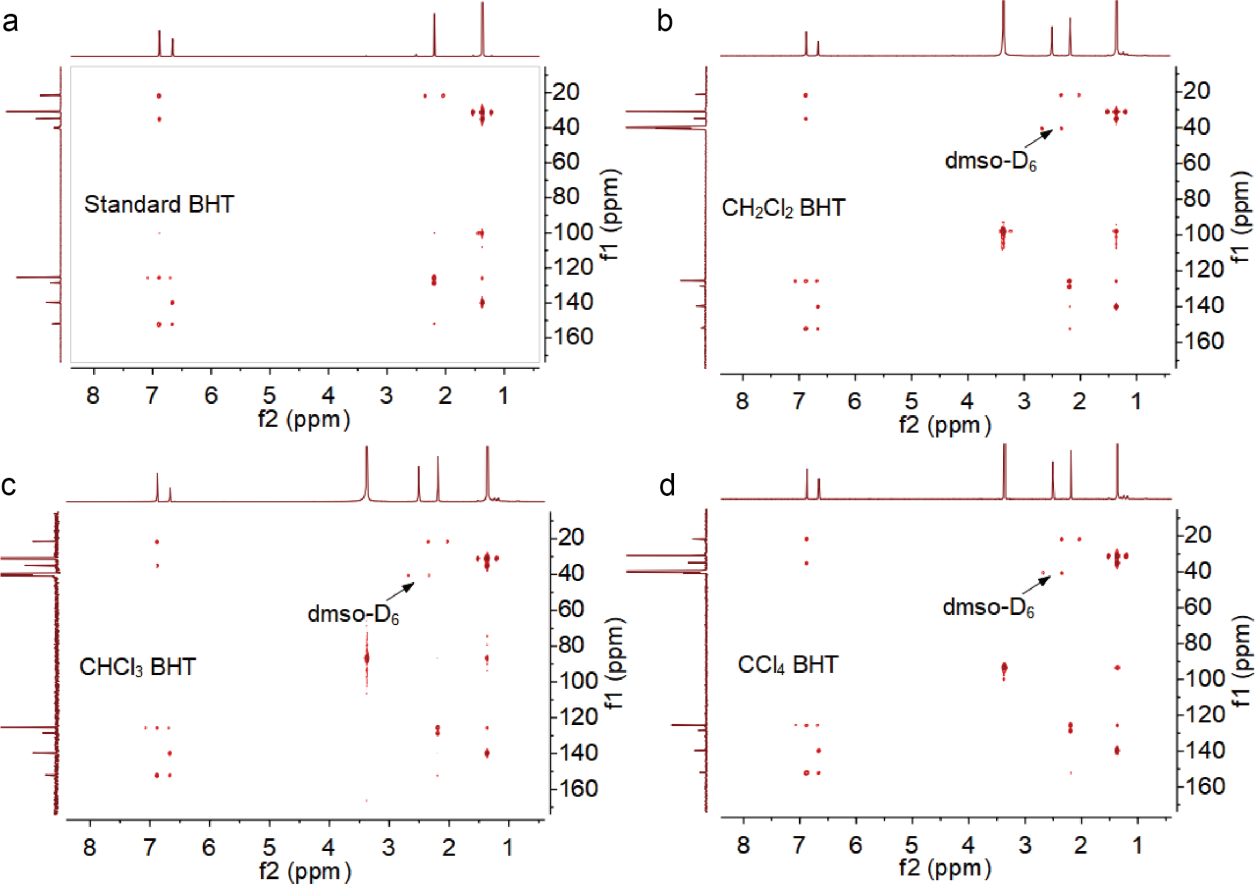


Fig. S15. Comparative HMBC NMR spectra of BHT standard (a) and BHT products obtained from different chlorinated carbon feedstocks (b, c, d).

## Section 3. The Morphology and Crystal Characterizations of Graphene Flakes


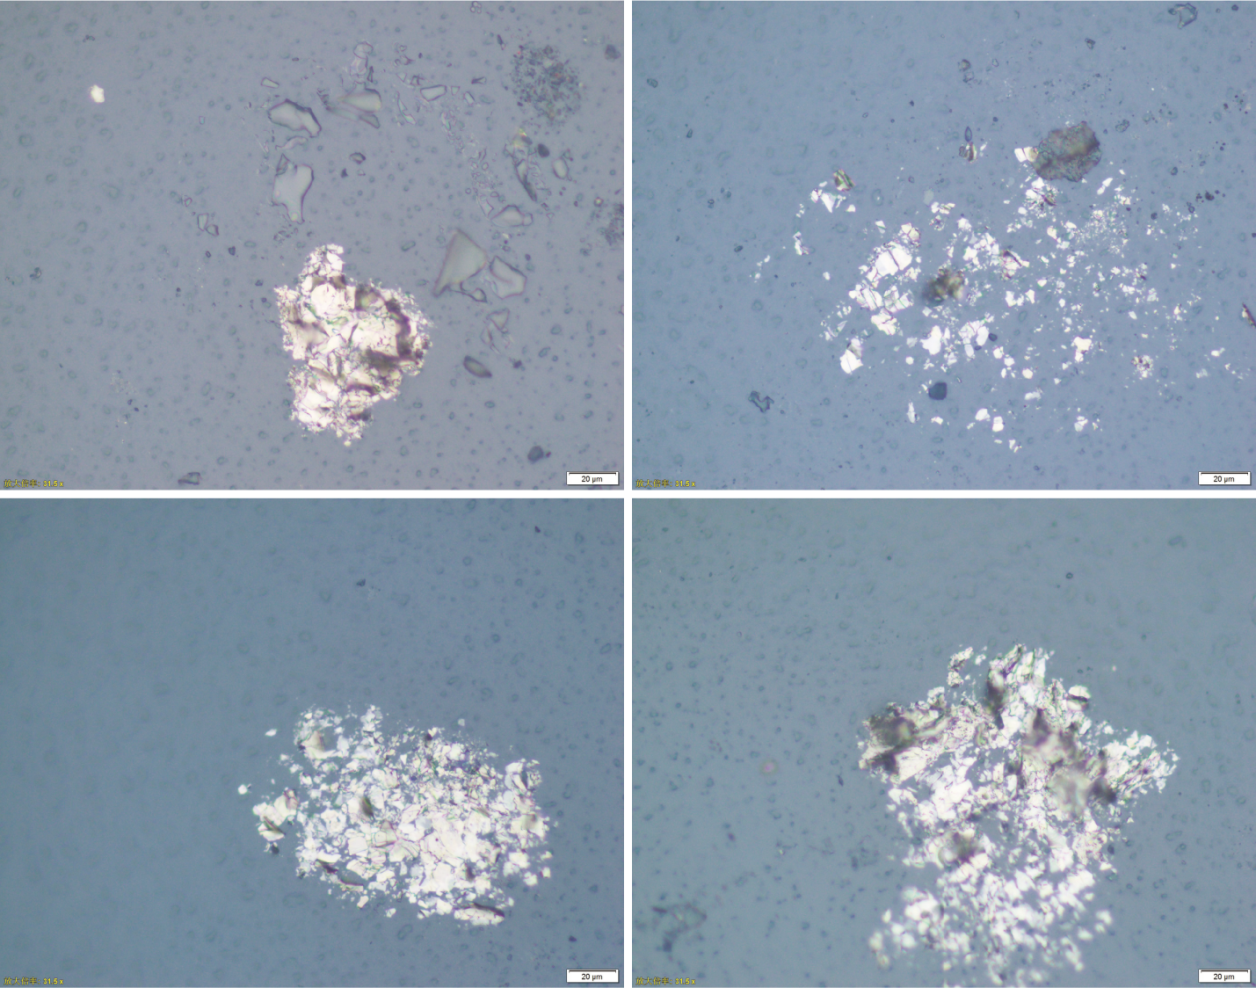


Fig. S16. Optical images of synthesized graphene flakes transferred on dicing tapes. Scale bar, 20 μm.


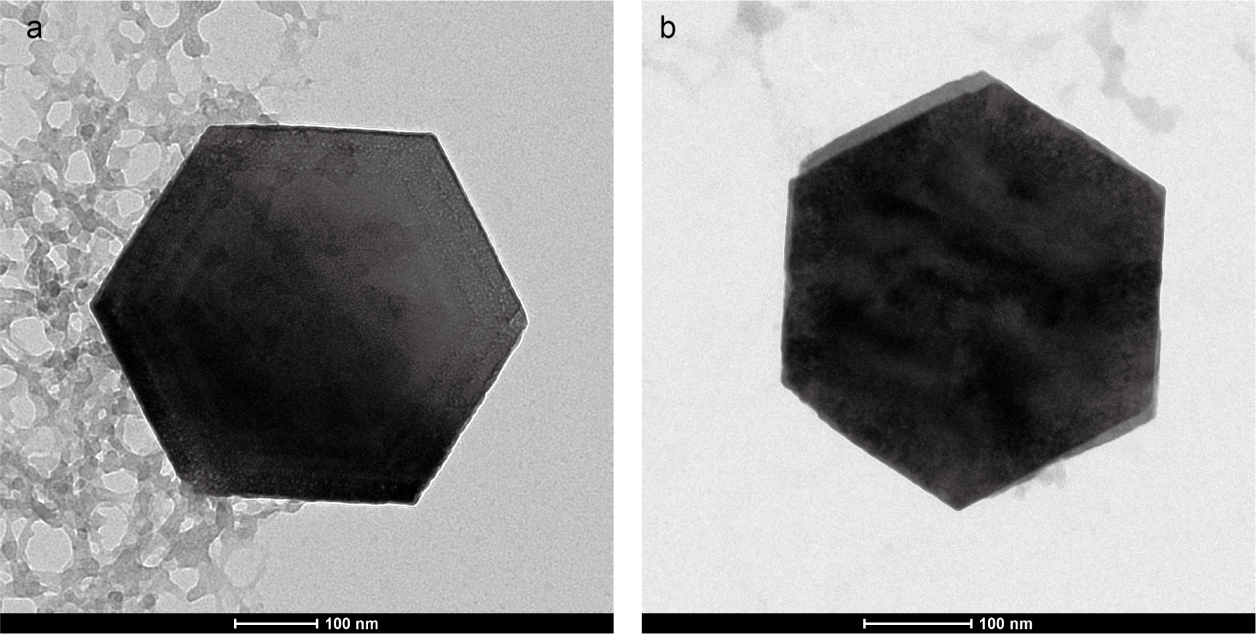


Fig. S17. More HR-TEM images of mesoscopic graphene seeds.


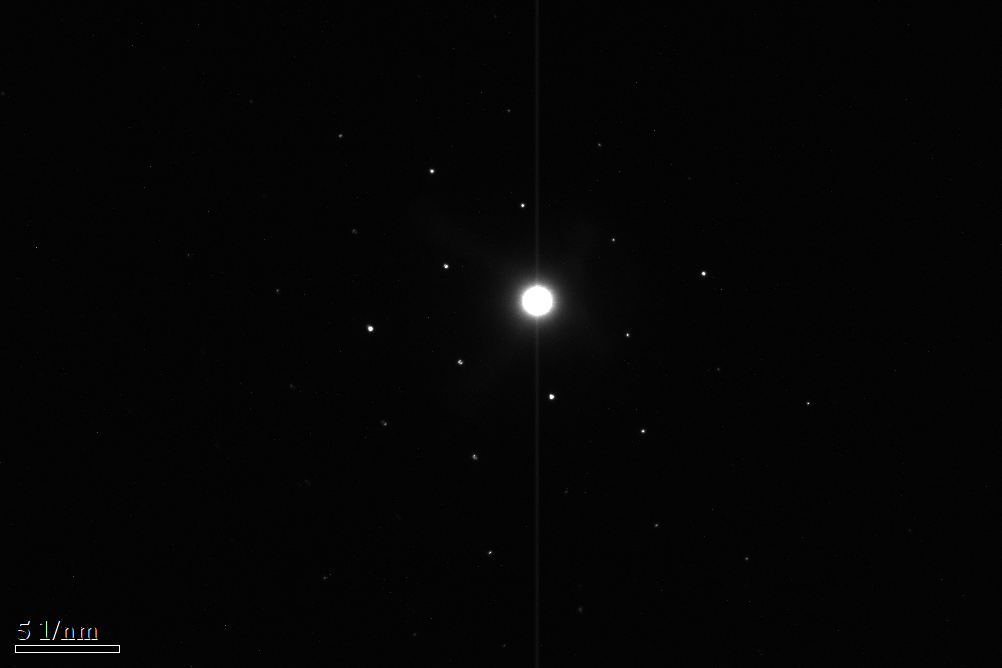


Fig. S18. SAED of mesoscopic graphene seed, displaying good alignment to the crystal structure of graphene.


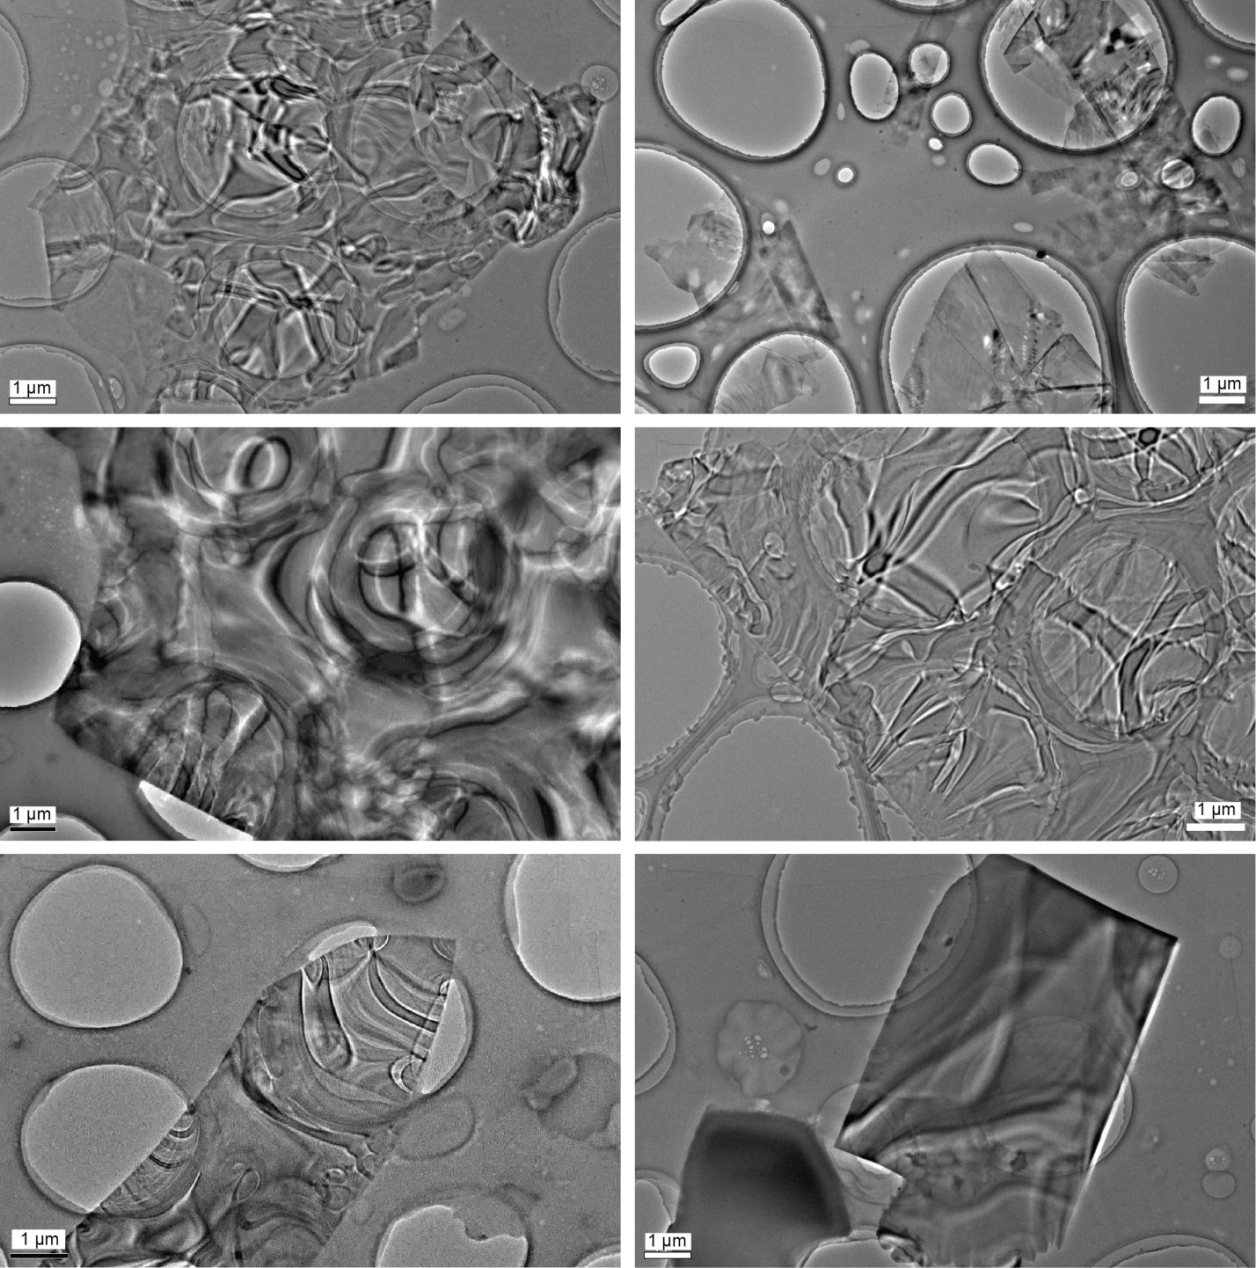


Fig. S19. Low-magnification HR-TEM image of exfoliated graphene sheets with a scale bar of 1 μm. The alternating bright and dark moiré patterns (wave-like contrasts) indicate the high crystallinity throughout the synthesized graphene.


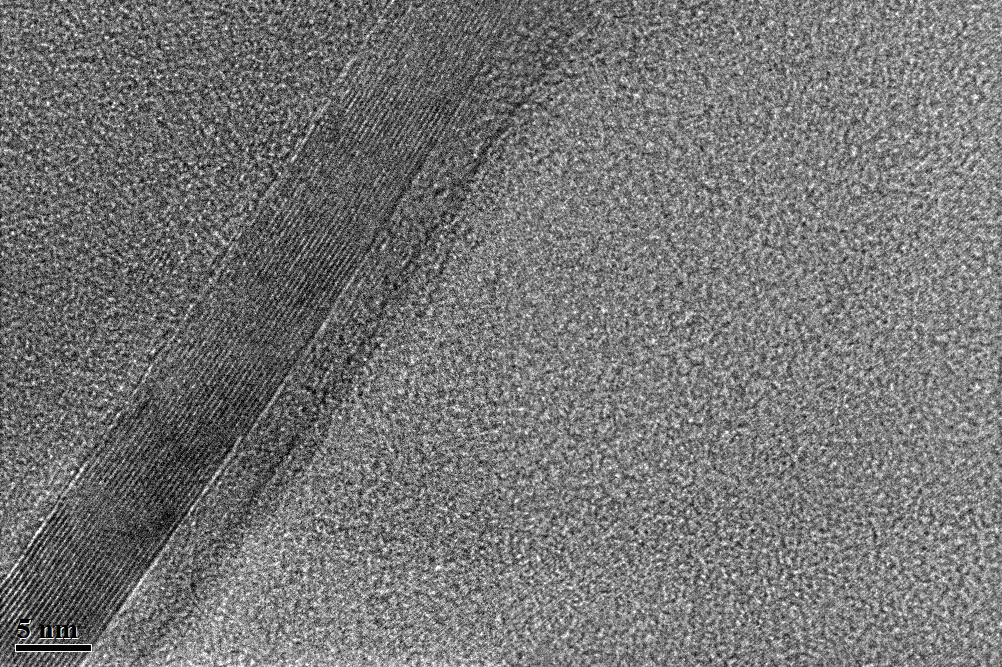


Fig. S20. HR-TEM image at the edge of the flakes. The patterns shown an inter-layer distance of 0.34 nm.


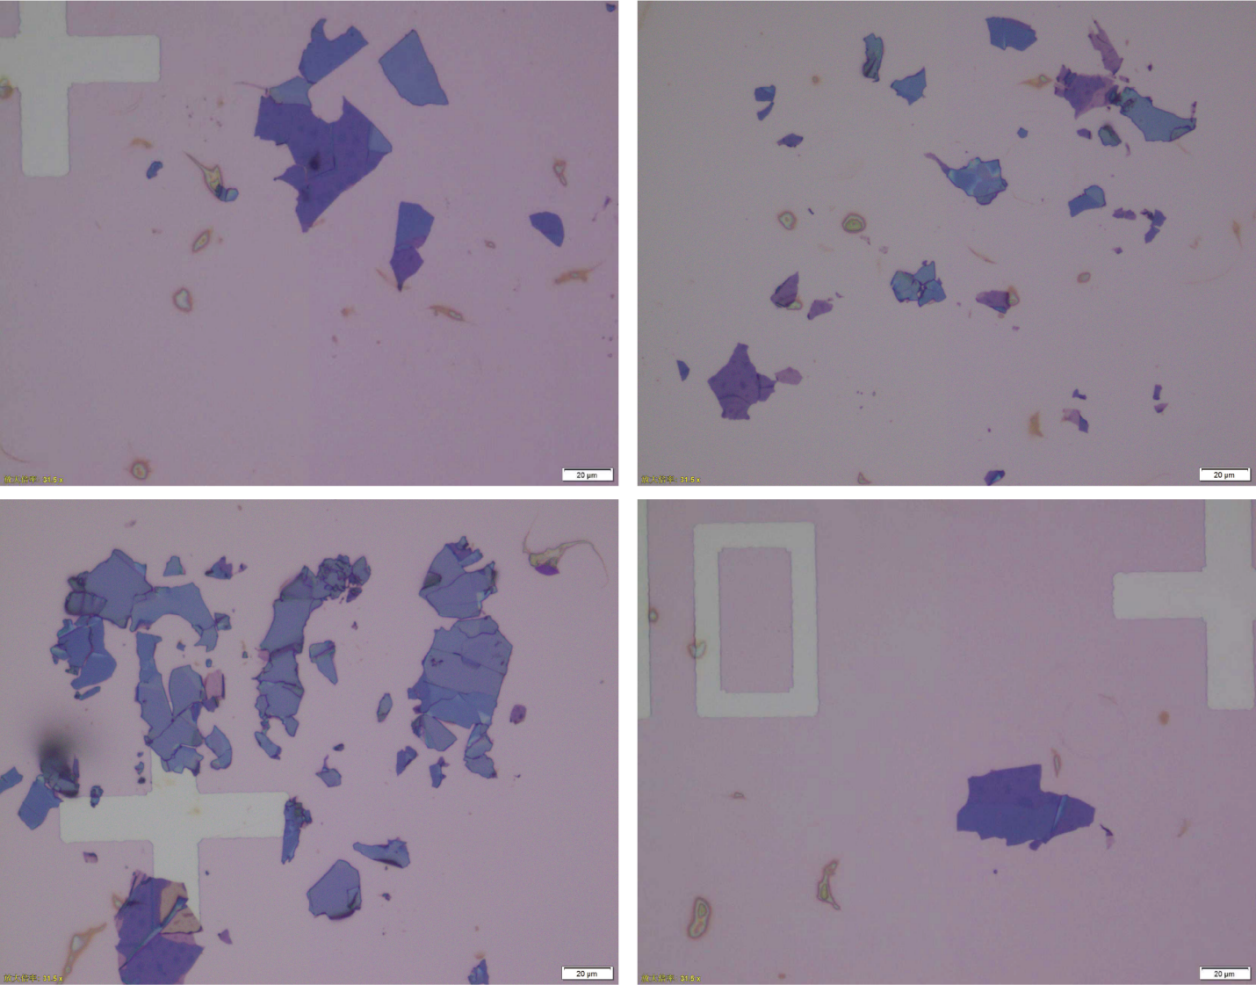


Fig. S21. Optical images of mechanical exfoliated synthesized graphene flakes on 5 nm gold coated SiO2/Si substrate, ready for STM measurements.


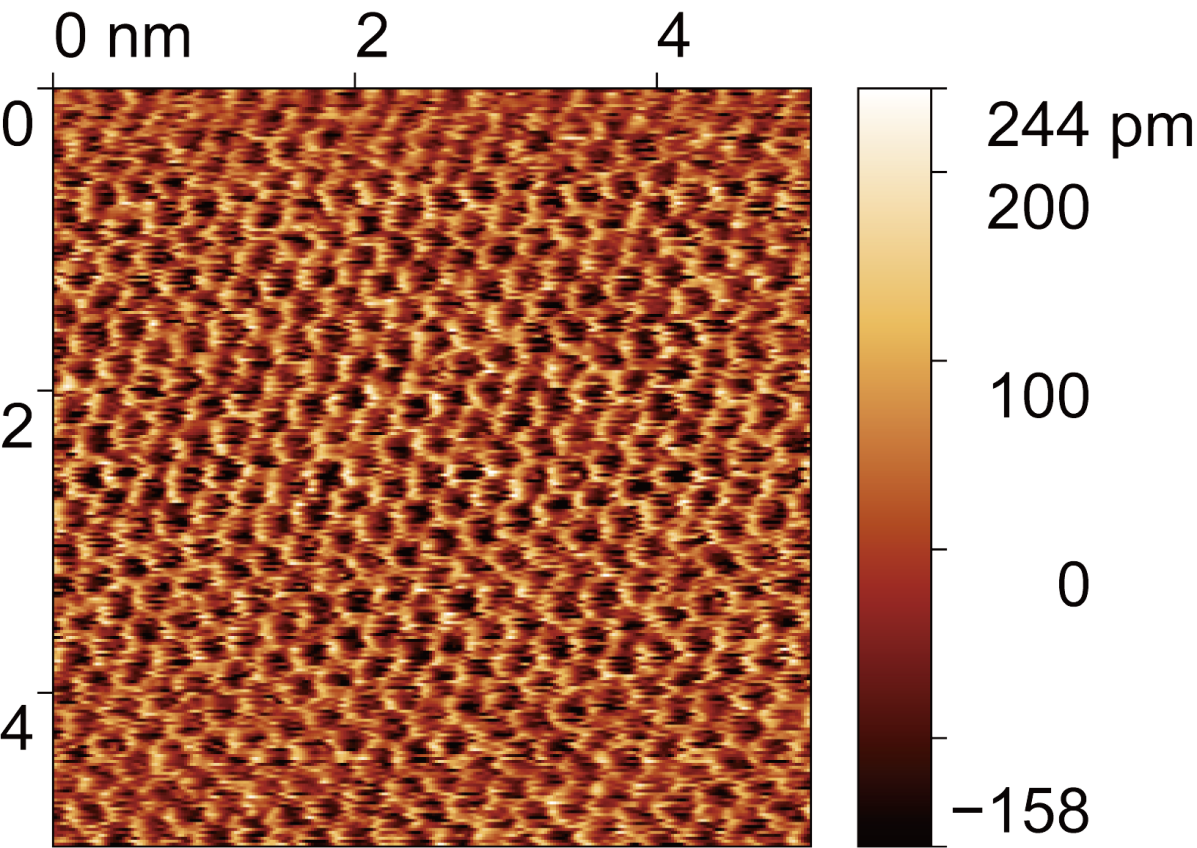


Fig. S22. HR-AFM image synthesized single crystal graphene. The hexagonal patterns are clearly visible, agreeing well with graphene.

## Section 4. Nano-ARPES


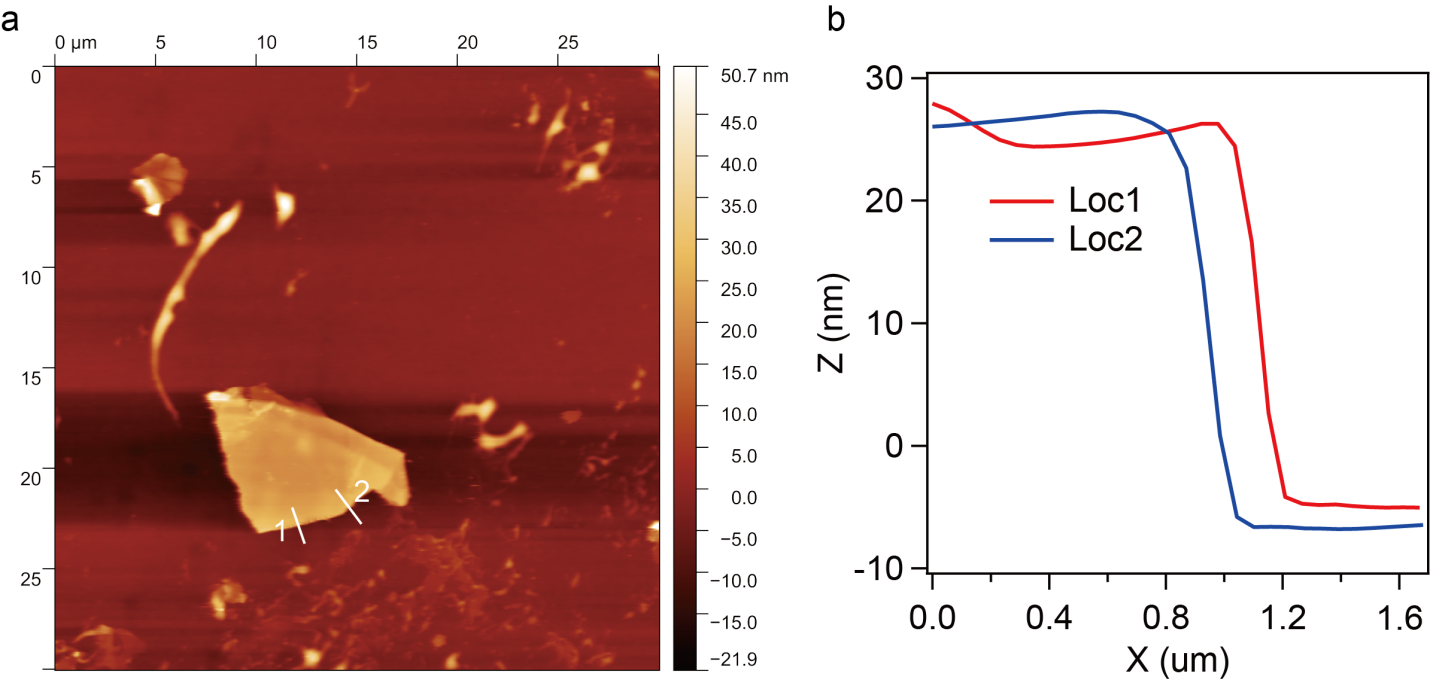


Fig. S23. AFM of measured flake post ARPES. a, Full image of AFM. b, Height profile, about 30 nm.


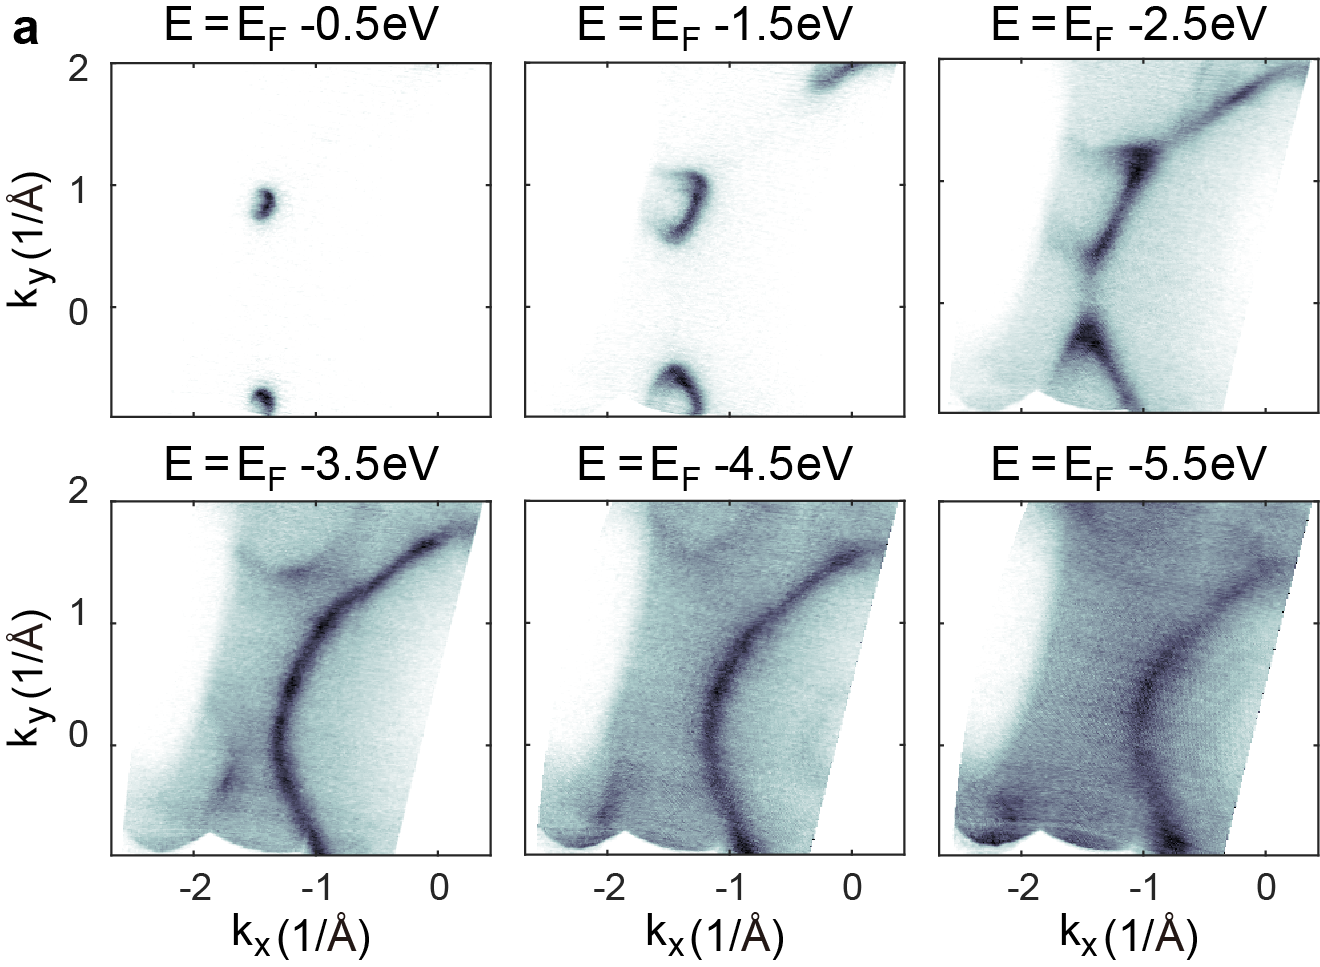


Fig. S24. Full constant-energy contours centered at the K point at different binding energies.


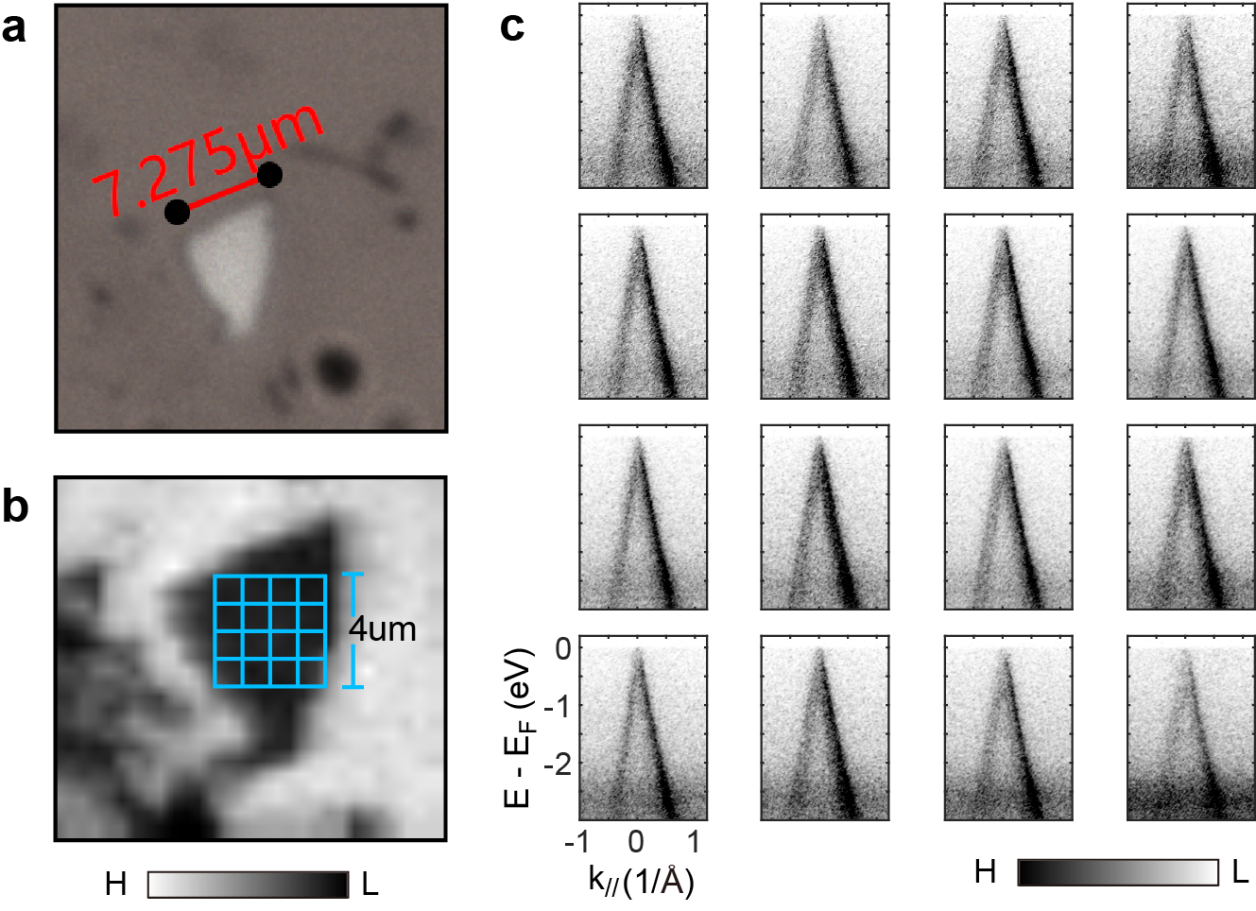


Fig. S25. a Optical image of measured sample. b Real-space photoemission intensity map from spatially resolved ARPES. We have scanned a 4 by 4 μm region (16 points) to check the uniformity. The grayscale bar indicates intensity variation (H = high, L = low). c, Quick scan of all 16 points results, displaying identical E-k relationship, demonstrating high sample quality and electronic uniformity across the measured region. The full-scale measurements were then taken at the center of the 4 by 4 region.
